# Supplementary material for: Healthspan and chronic disease burden among young adult and middle-aged male former American-style professional football players
Source: PubMed Central journal article supplement — Br J Sports Med. 2022 Dec 7;57(3):166–71. doi: 10.1136/bjsports-2022-106021 (PMC9887383; doi:10.1136/bjsports-2022-106021), 2022-12-07
Supplement: bjsports-2022-106021supp001.pdf [file bjsports-2022-106021supp001.pdf]

**Supplemental Table 1.** Race- and BMI-adjusted prevalence estimate comparisons between National Health and Nutrition Examination Survey (NHANES) and National Health Interview Survey (NHIS) for hypertension/high blood pressure (HTN) and diabetes mellitus/high blood sugar (DM). Significance values have been adjusted using the Bonferonni correction for multiple comparisons. P-values have been adjusted for multiple comparisons.

| Age group | Condition | NHANES prevalence % | NHIS prevalence % | SPR  | SPR lower 95% CI | SPR upper 95% CI | P-value |
|-----------|-----------|---------------------|-------------------|------|------------------|------------------|---------|
| 25-29     | DM        | 1.33                | 0.55              | 0.42 | 0.41             | 6.07             | 0.99    |
| 30-39     | DM        | 1.9                 | 2.01              | 1.06 | 0.4              | 1.72             | 0.99    |
| 40-49     | DM        | 7.7                 | 7.32              | 0.95 | 0.72             | 1.45             | 0.99    |
| 50-59     | DM        | 15.96               | 13.37             | 0.84 | 0.93             | 1.49             | 0.69    |
| 25-29     | HTN       | 6.47                | 8.54              | 1.32 | 0.41             | 1.22             | 0.96    |
| 30-39     | HTN       | 15.7                | 16.83             | 1.07 | 0.72             | 1.17             | 0.99    |
| 40-49     | HTN       | 24.66               | 30.62             | 1.24 | 0.66             | 0.97             | 0.06    |
| 50-59     | HTN       | 43.96               | 42.41             | 0.96 | 0.9              | 1.19             | 0.99    |

**Supplemental Table 2.** Standardized prevalence estimates, standardized prevalence ratios, 95% confidence intervals (CI) and p-values for the Football Player Health Study (FPHS), National Health and Nutrition Examination Survey (NHANES), and National Health Interview Survey (NHIS) to accompany Figures 1-3. P-values have been adjusted for multiple comparisons.

| <i>Standardized Prevalence of Healthspan<sup>a</sup></i>                    |                |                    |                     |                |
|-----------------------------------------------------------------------------|----------------|--------------------|---------------------|----------------|
| <b>Age group</b>                                                            | <b>NHIS</b>    | <b>FPHS</b>        | <b>SPR (95% CI)</b> | <b>p-value</b> |
| 25-29                                                                       | 87.5           | 70.5               | 1.25 (1.05, 1.46)   | 0.066          |
| 30-39                                                                       | 79.9           | 66.4               | 1.2 (1.11, 1.29)    | <0.001         |
| 40-49                                                                       | 61.6           | 47.9               | 0.78 (0.7, 0.87)    | <0.001         |
| 50-59                                                                       | 44.3           | 32.5               | 0.73 (0.65, 0.82)   | <0.001         |
| <i>Standardized Prevalence of Arthritis<sup>a</sup></i>                     |                |                    |                     |                |
| <b>Age group</b>                                                            | <b>NHANES</b>  | <b>FPHS</b>        | <b>SPR (95% CI)</b> | <b>p-value</b> |
| 25-29                                                                       | 5.0            | 22.0               | 0.23 (0.11, 0.38)   | <0.001         |
| 30-39                                                                       | 10.4           | 27.8               | 0.37 (0.27, 0.49)   | <0.001         |
| 40-49                                                                       | 19.3           | 47.2               | 0.41 (0.33, 0.51)   | <0.001         |
| 50-59                                                                       | 39.1           | 53.3               | 0.73 (0.63, 0.85)   | <0.001         |
| <i>Standardized Prevalence of Dementia/Alzheimer's Disease<sup>a</sup></i>  |                |                    |                     |                |
| <b>Age group</b>                                                            | <b>NHIS</b>    | <b>FPHS</b>        | <b>SPR (95% CI)</b> | <b>p-value</b> |
| 25-29                                                                       | 0              | 0                  | NA                  | NA             |
| 30-39                                                                       | 0.1            | 0.6                | 0.08 (0.1, 0.77)    | <0.001         |
| 40-49                                                                       | 0.1            | 0.9                | 0.19 (0.01, 0.93)   | 0.002          |
| 50-59                                                                       | 0.2            | 2.2                | 0.13 (0, 0.46)      | <0.001         |
| <i>Standardized Prevalence of Hypertension<sup>a</sup></i>                  |                |                    |                     |                |
| <b>Age group</b>                                                            | <b>NHANES</b>  | <b>FPHS</b>        | <b>SPR (95% CI)</b> | <b>p-value</b> |
| 25-29                                                                       | 6.5            | 12.2               | 0.52 (0.28, 0.84)   | 0.003          |
| 30-39                                                                       | 15.7           | 13.8               | 1.18 (0.91, 1.49)   | 0.877          |
| 40-49                                                                       | 24.7           | 17.2               | 1.42 (1.16, 1.71)   | 0.011          |
| 50-59                                                                       | 44.0           | 33.5               | 1.31 (1.13, 1.5)    | 0.004          |
| <i>Standardized Prevalence of Diabetes<sup>a</sup></i>                      |                |                    |                     |                |
| <b>Age group</b>                                                            | <b>NHANES</b>  | <b>FPHS</b>        | <b>SPR (95% CI)</b> | <b>p-value</b> |
| 25-29                                                                       | 1.3            | 6.8                | 0.2 (0.03, 0.5)     | <0.001         |
| 30-39                                                                       | 1.9            | 1.5                | 1.21 (0.51, 2.21)   | >0.999         |
| 40-49                                                                       | 7.7            | 4.4                | 1.75 (1.19, 2.4)    | 0.063          |
| 50-59                                                                       | 7.0            | 16.0               | 2.29 (1.79, 2.85)   | <0.001         |
| <i>Standardized Prevalence of Football position (FPHS only)<sup>b</sup></i> |                |                    |                     |                |
| <b>Age group</b>                                                            | <b>Linemen</b> | <b>Non-Linemen</b> | <b>SPR (95% CI)</b> | <b>p-value</b> |
| 25-29                                                                       | 49.2           | 77.2               | 0.56 (0.37, 0.8)    | <0.001         |
| 30-39                                                                       | 37.4           | 71.9               | 0.52 (0.43, 0.62)   | <0.001         |
| 40-49                                                                       | 34.0           | 50.1               | 0.68 (0.54, 0.84)   | <0.001         |
| 50-59                                                                       | 29.8           | 33.3               | 0.9 (0.72, 1.09)    | >0.999         |

<sup>a</sup>NHANES/NHIS cohorts were designated as “observed”.

<sup>b</sup>Linemen were designated as “observed”.
